# Supplementary material for: Synthesis, Anti-Inflammatory Activities, and Molecular Docking Study of Novel Pyxinol Derivatives as Inhibitors of NF-κB Activation
Source: MDPI journal article supplement (doi:10.3390/molecules29081711), 2024-04-10

## Supporting information

# Synthesis, Anti-inflammatory Activities, and Molecular Docking Study of Novel Pyxinol Derivatives as Inhibitors of NF- $\kappa$ B Activation

Shuai Tan,<sup>1</sup>‡ Zongji Zou,<sup>1</sup>‡ Xuwen Luan,<sup>1</sup>‡ Cheng Chen,<sup>1</sup> Shuang Li,<sup>1</sup> Zhen Zhang,<sup>1</sup> Mengran Quan,<sup>1</sup> Xiang Li,<sup>1</sup> Wei Zhu,<sup>1,\*</sup> and Gangqiang Yang<sup>1,\*</sup>

<sup>1</sup> School of Pharmacy, Collaborative Innovation Center of Advanced Drug Delivery System and Biotech Drugs in Universities of Shandong, Key Laboratory of Molecular Pharmacology and Drug Evaluation (Yantai University), Ministry of Education, Yantai University, Yantai, 264005, China

‡ The authors contributed equally.

Corresponding authors: oceanygq@ytu.edu.cn (Gangqiang Yang), zhuwei853@163.com (Wei Zhu)

Table of contents:  
<sup>1</sup>H and <sup>13</sup>C NMR Spectra

SI 2

### <sup>1</sup>H and <sup>13</sup>C NMR Spectra of **2a**

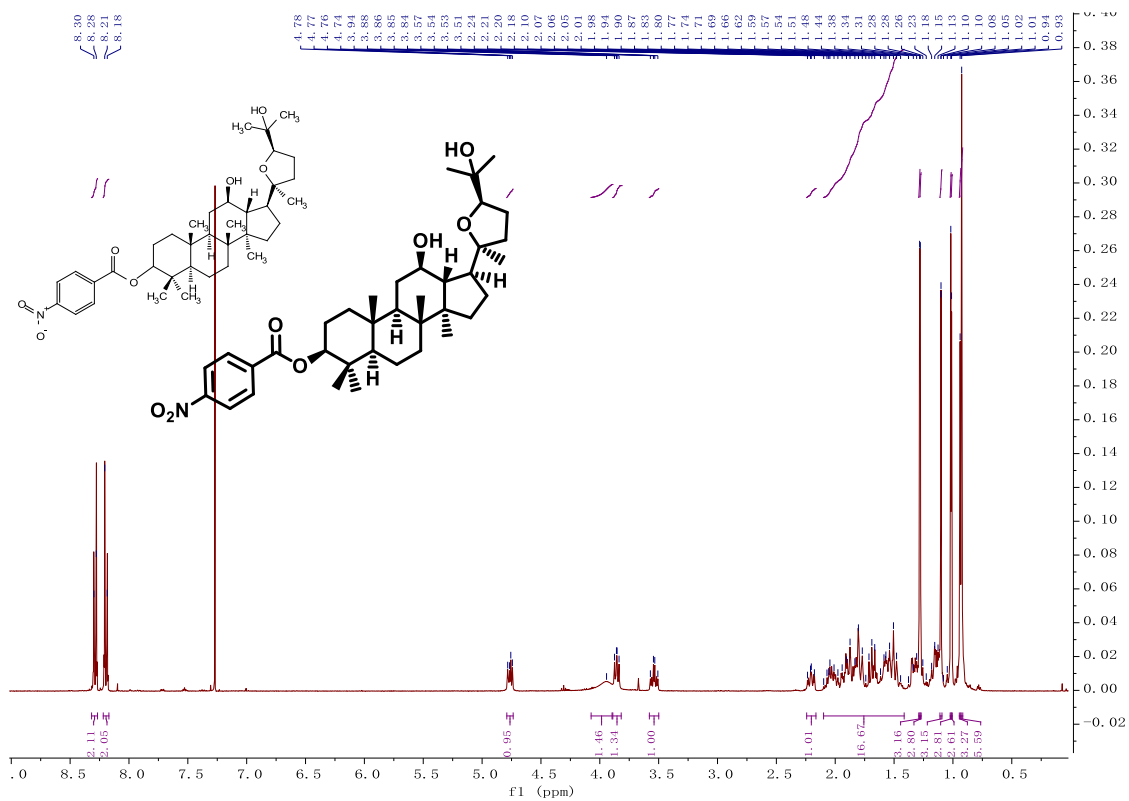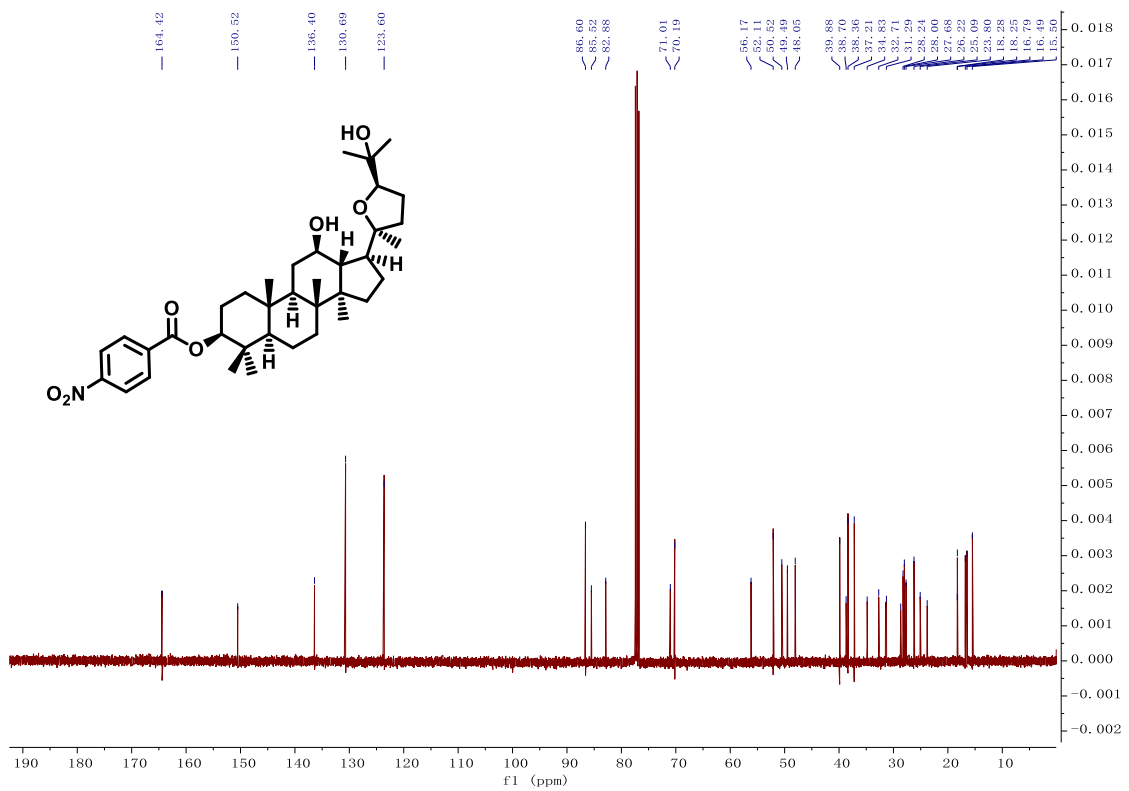

# <sup>1</sup>H and <sup>13</sup>C NMR Spectra of **2b**

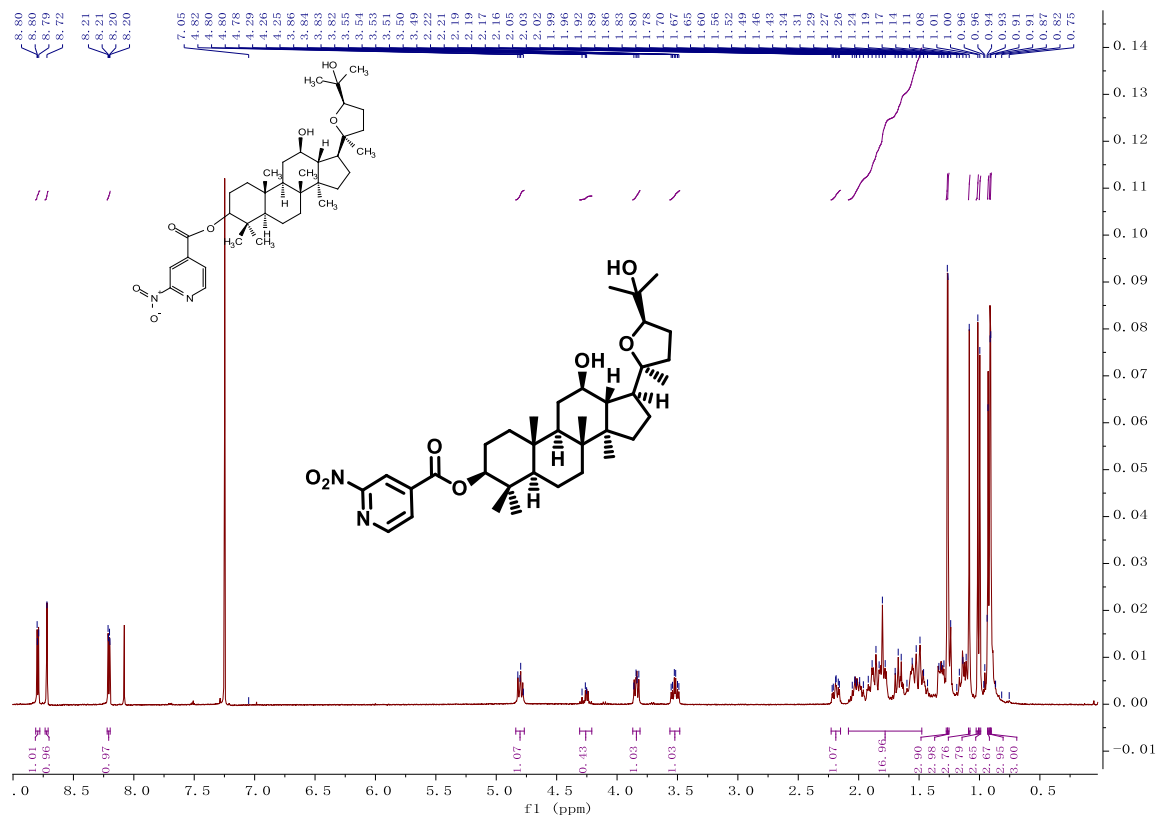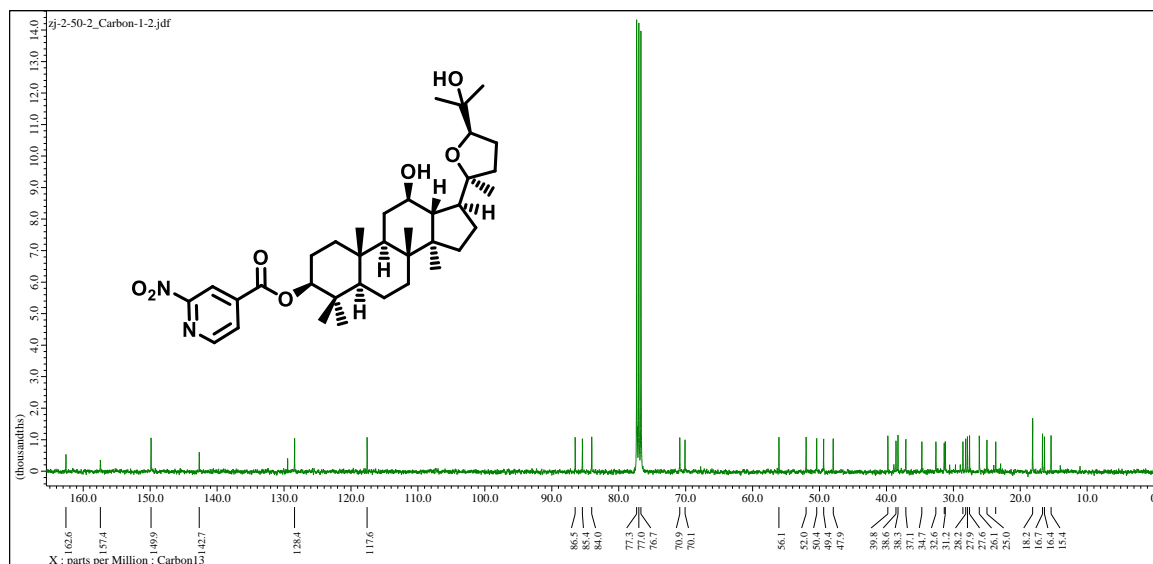

### <sup>1</sup>H and <sup>13</sup>C NMR Spectra of **2c**

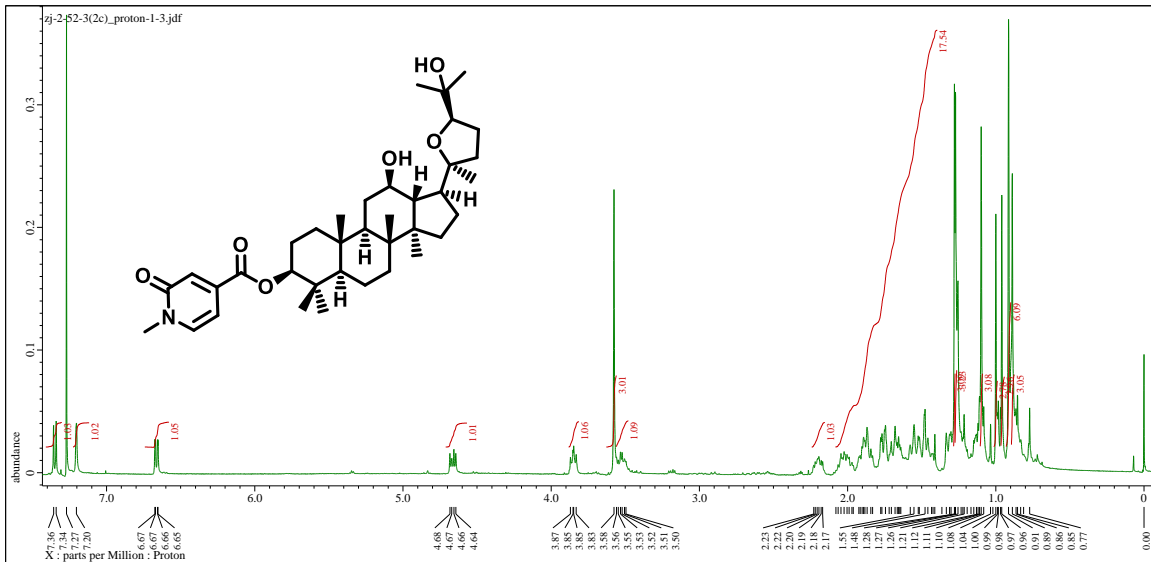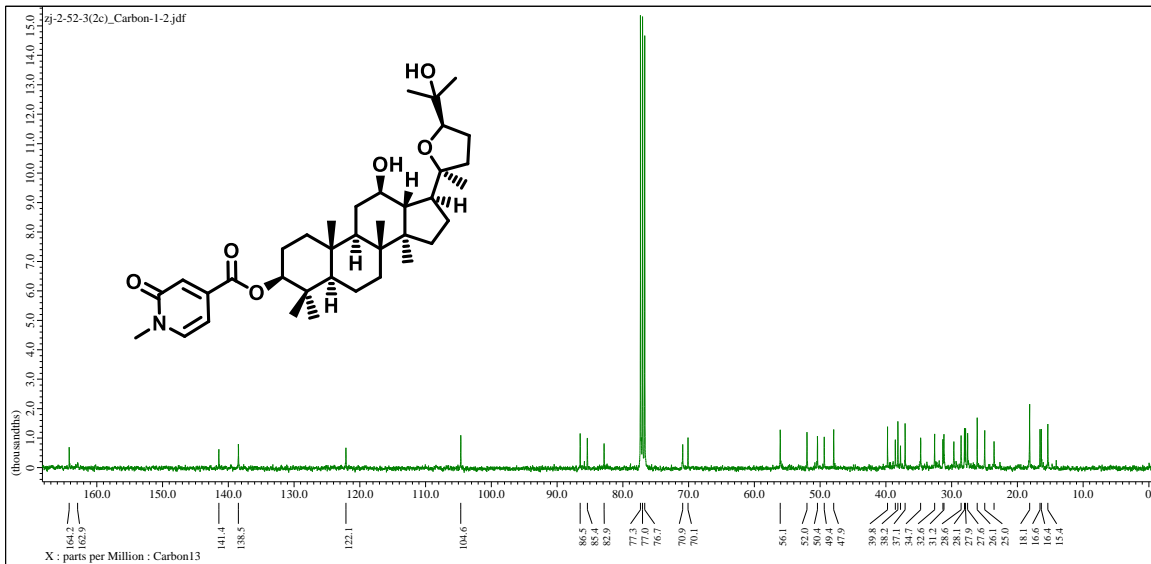

# <sup>1</sup>H and <sup>13</sup>C NMR Spectra of **2d**

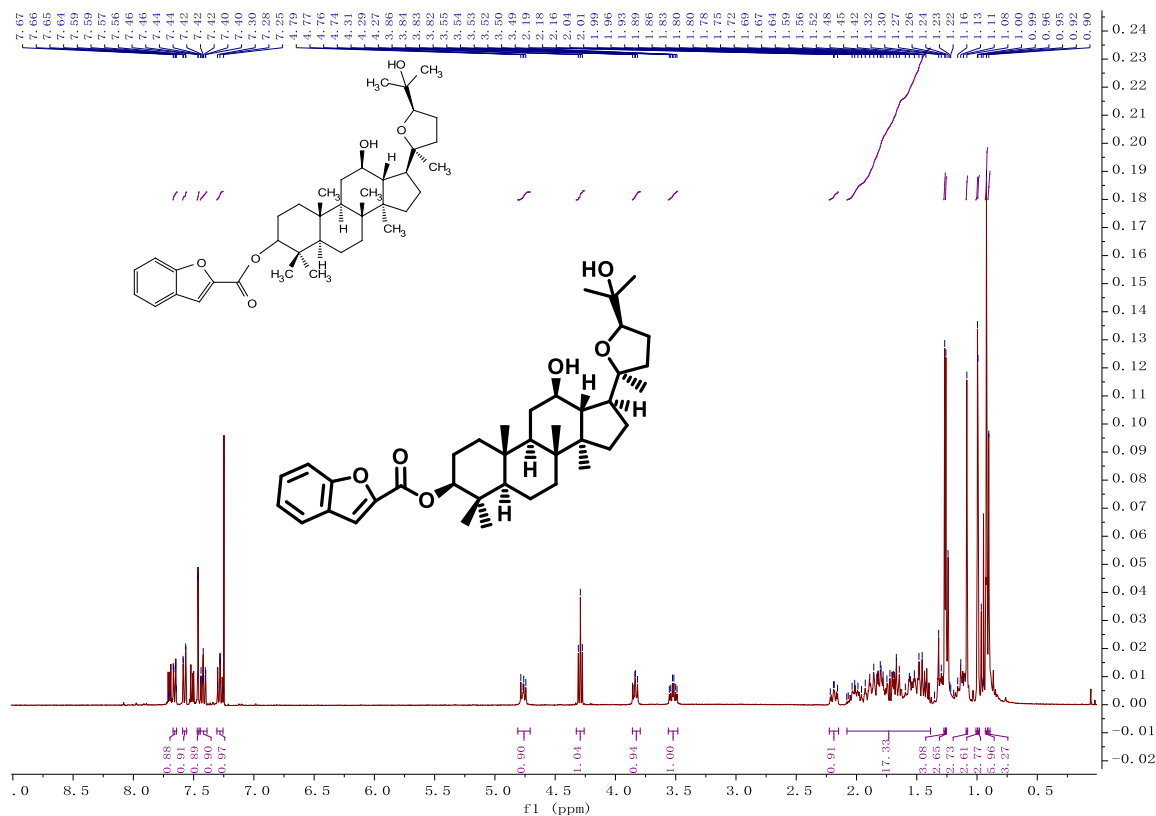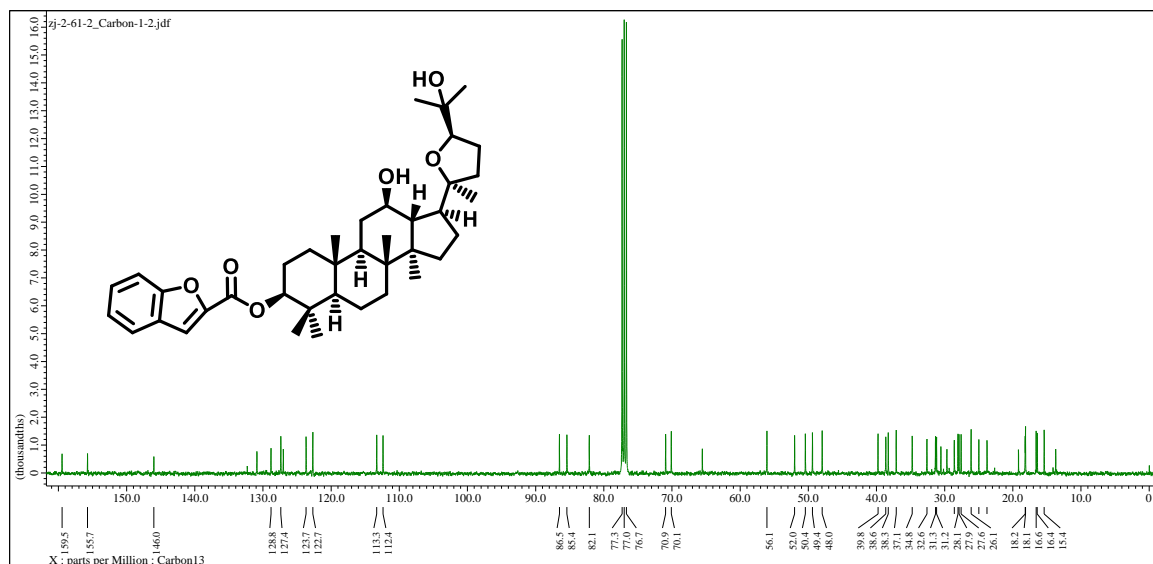

### <sup>1</sup>H and <sup>13</sup>C NMR Spectra of **2e**

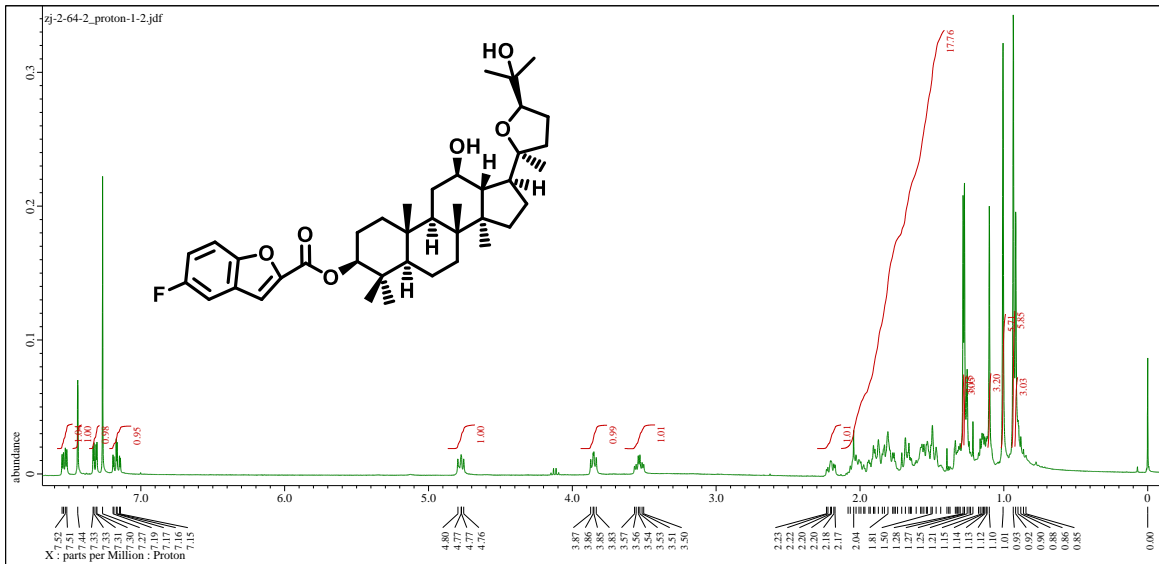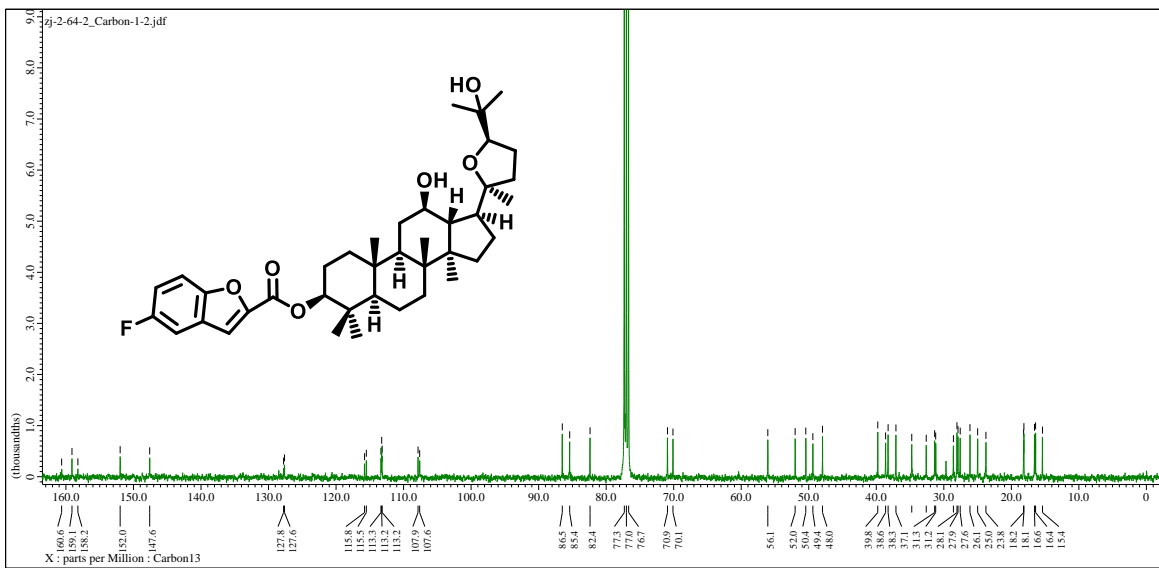

# $^1\text{H}$ and $^{13}\text{C}$ NMR Spectra of **2f**

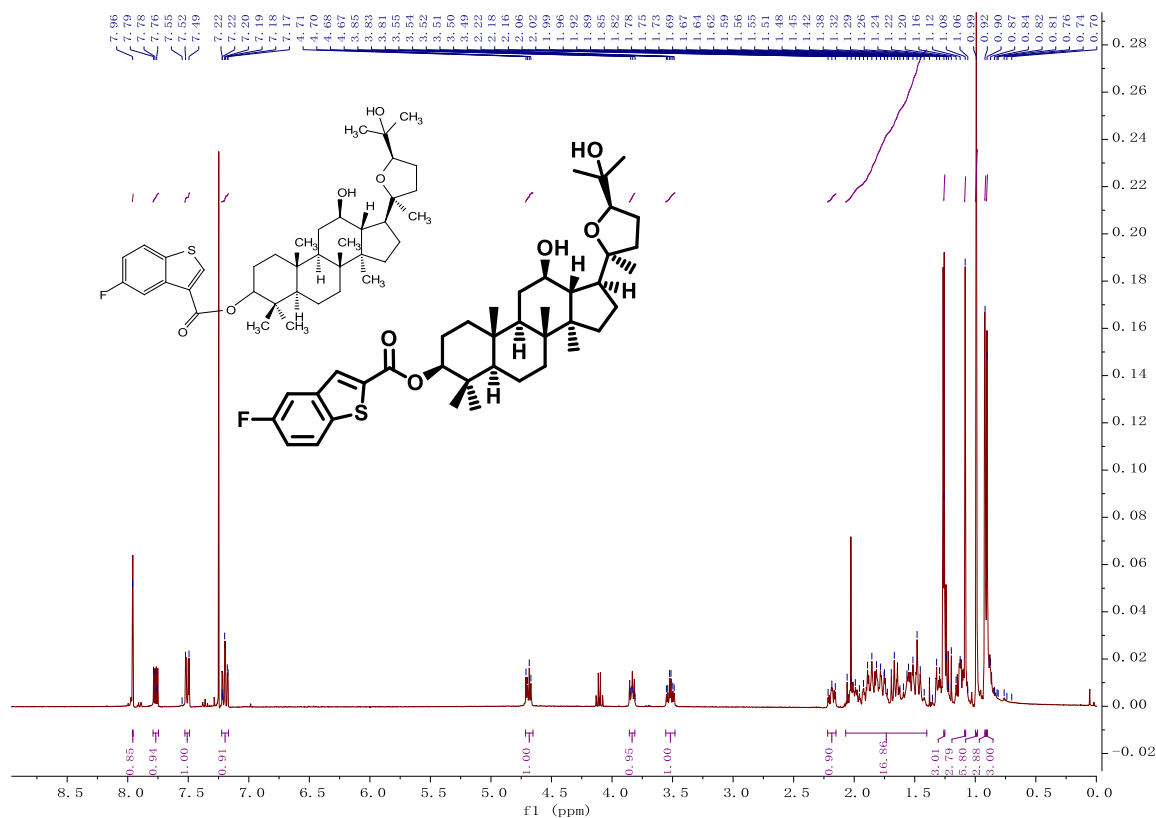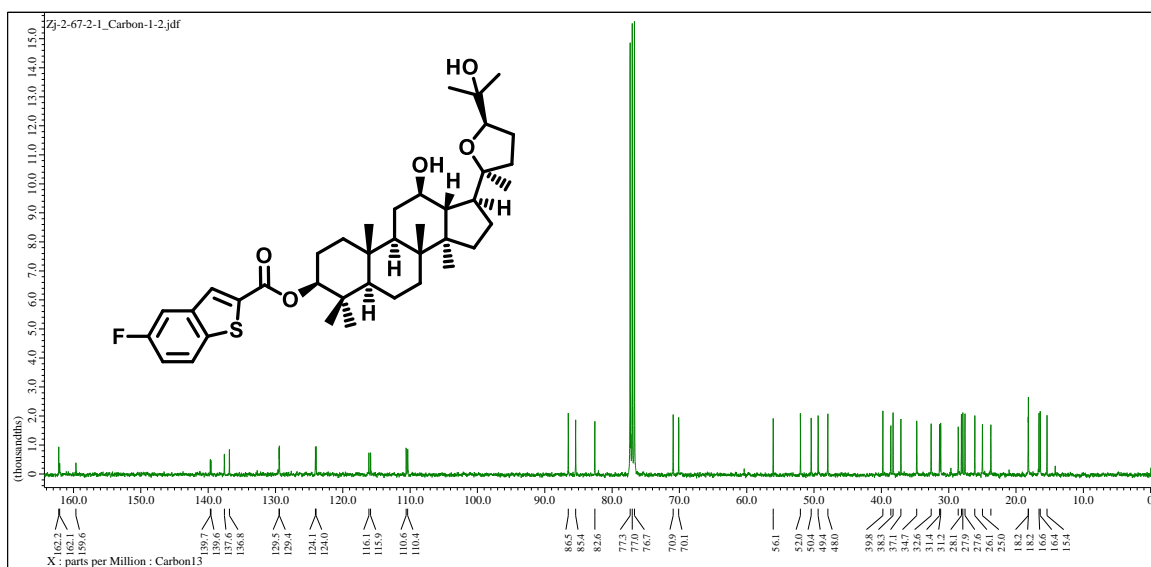

# $^1\text{H}$ and $^{13}\text{C}$ NMR Spectra of **2g**

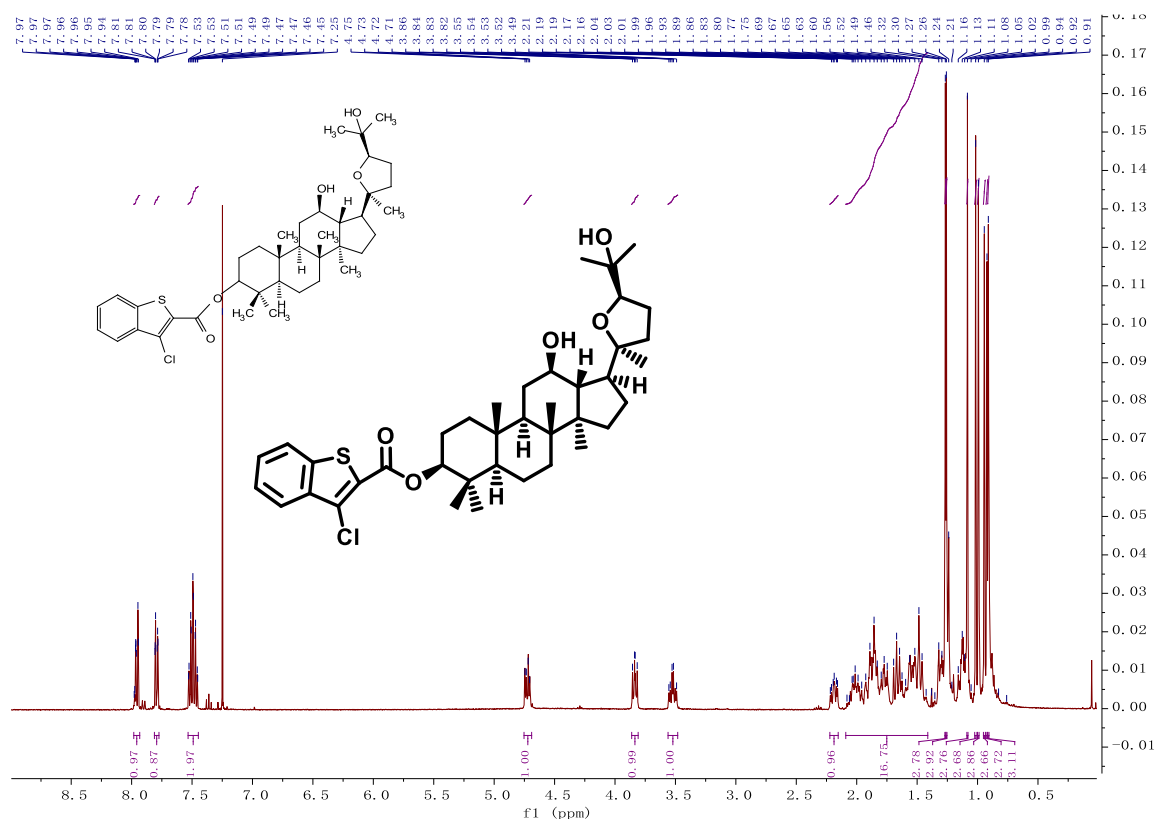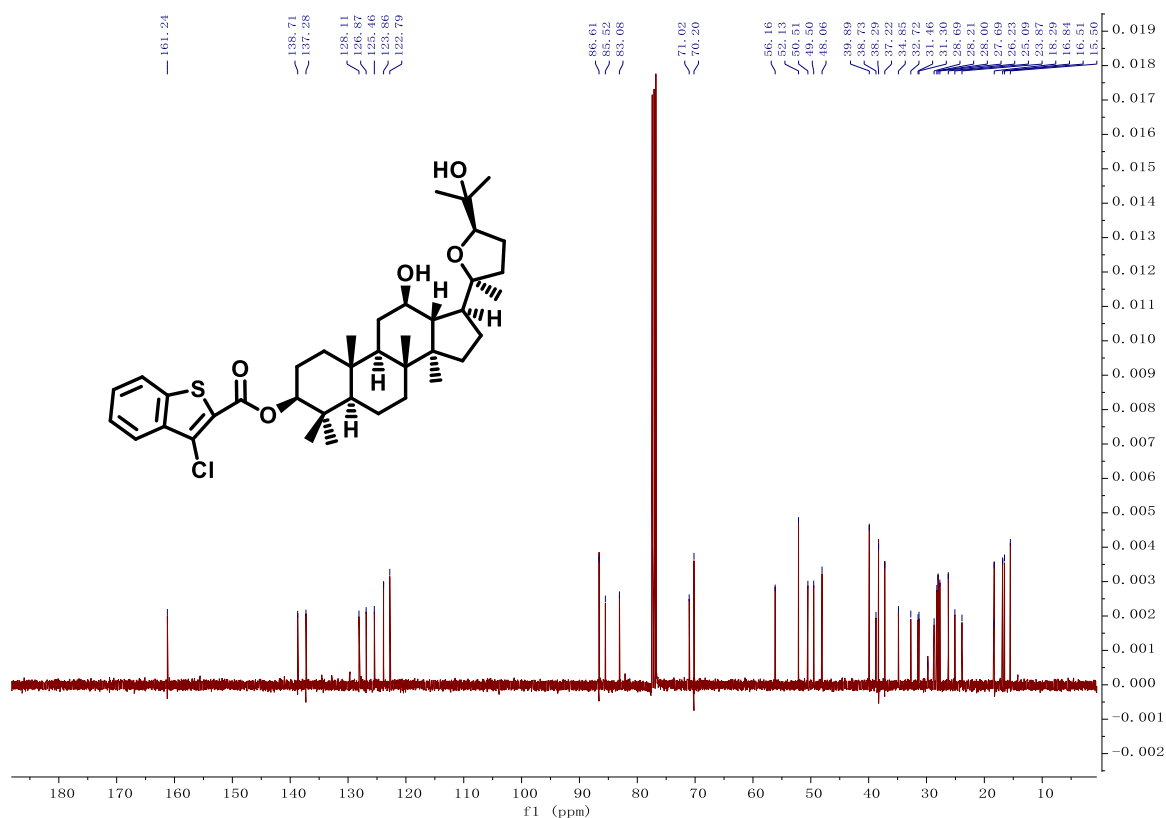



### $^1\text{H}$ and $^{13}\text{C}$ NMR Spectra of **2h**

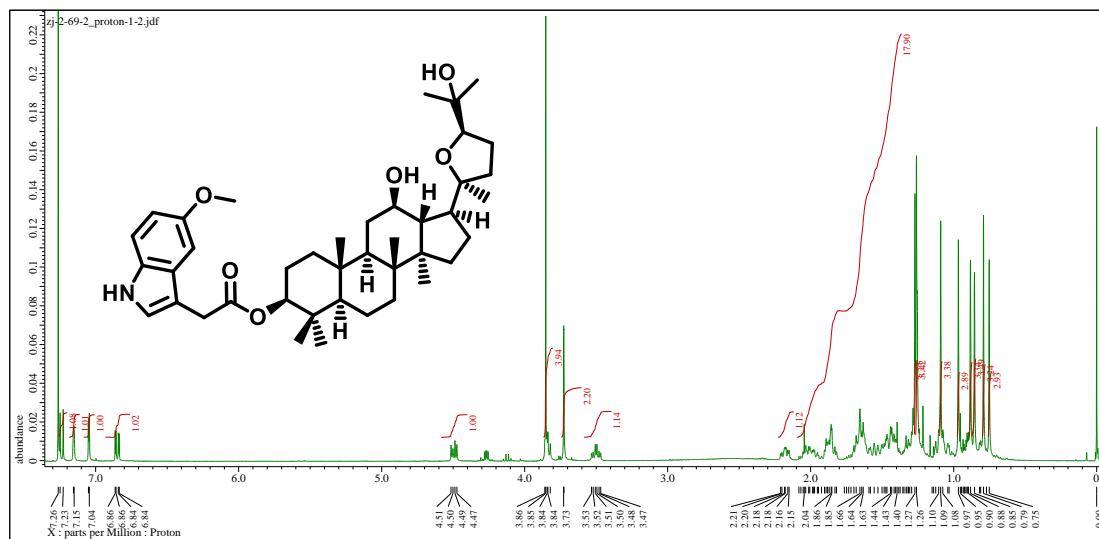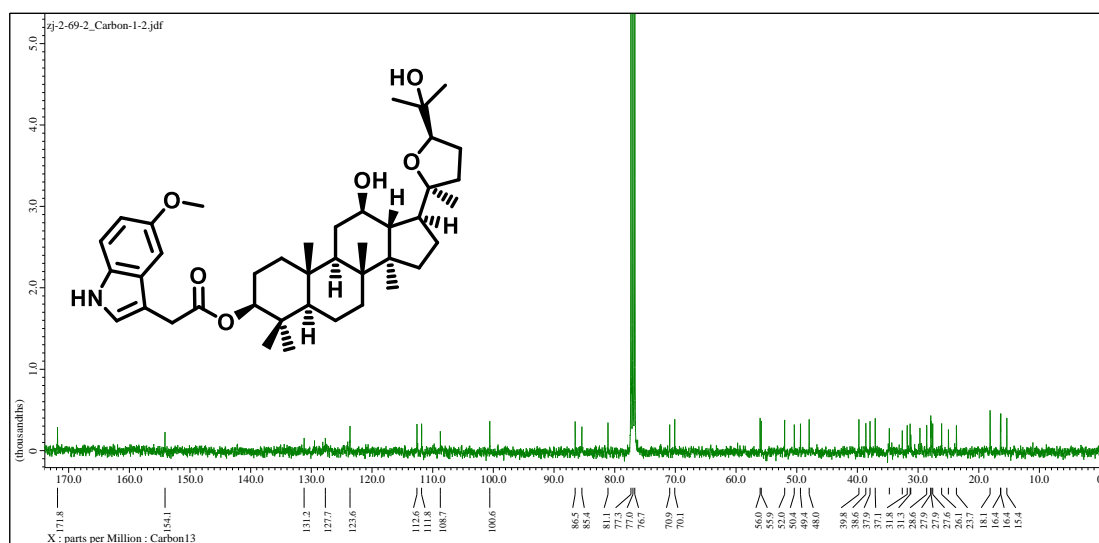

Supplement: s1 [file s1]
